# Supplementary material for: Single up-conversion nanocrystal as a local temperature probe of electrically heated silver nanowire
Source: Royal Society of Chemistry journal article supplement (doi:10.1039/d3nr01461d), 2023-01-01
Supplement: d3nr01461d1.pdf [file d3nr01461d1.pdf]

**Supplementary information for:**

**Single up-conversion nanocrystal as a local temperature probe  
of electrically heated silver nanowire**

K. Wiwatowski<sup>1</sup>, K. Sulowska<sup>1</sup>, R. Houssaini<sup>2</sup>, A. Pilch-Wróbel<sup>3</sup>,  
A. Bednarkiewicz<sup>3</sup>, A. Hartschuh<sup>2</sup>, S. Maćkowski<sup>1</sup>, D. Piątkowski<sup>1</sup>

1. Institute of Physics, Faculty of Physics, Astronomy and Informatics, Nicolaus Copernicus University in Toruń, ul. Grudziądzka 5, 87-100 Toruń, Poland
2. Department of Chemistry and Center for NanoScience (CeNS), LMU Munich, Butenandtstr. 5-13, 81377 Munich, Germany
3. Institute of Low Temperature and Structure Research, Polish Academy of Sciences, Okólna 2, 50-422 Wrocław, Poland

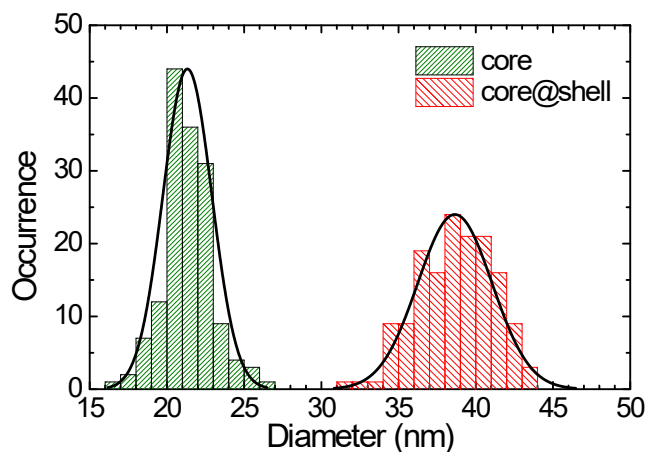

Fig. S1. Statistical distribution of NaYF<sub>4</sub>:Er<sup>3+</sup>/Yb<sup>3+</sup> nanocrystals diameter

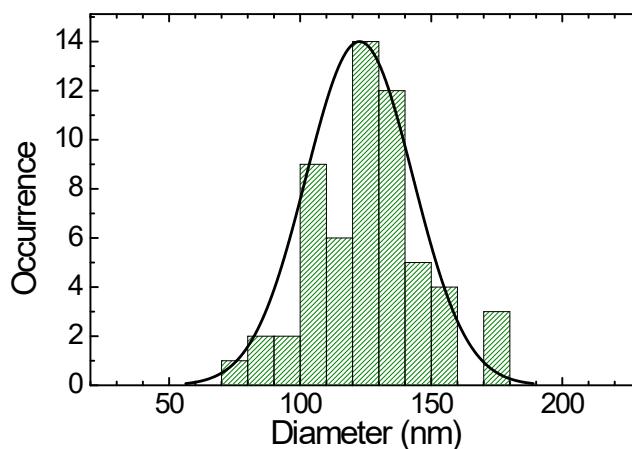

Fig. S2. Statistical distribution of Ag nanowires diameter
